# Supplementary figures and images for: Refraction Correction for Spectrally Derived Bathymetry Using UAS Imagery
Source: MDPI journal article supplement (doi:10.3390/rs15143635), 2023-07-21

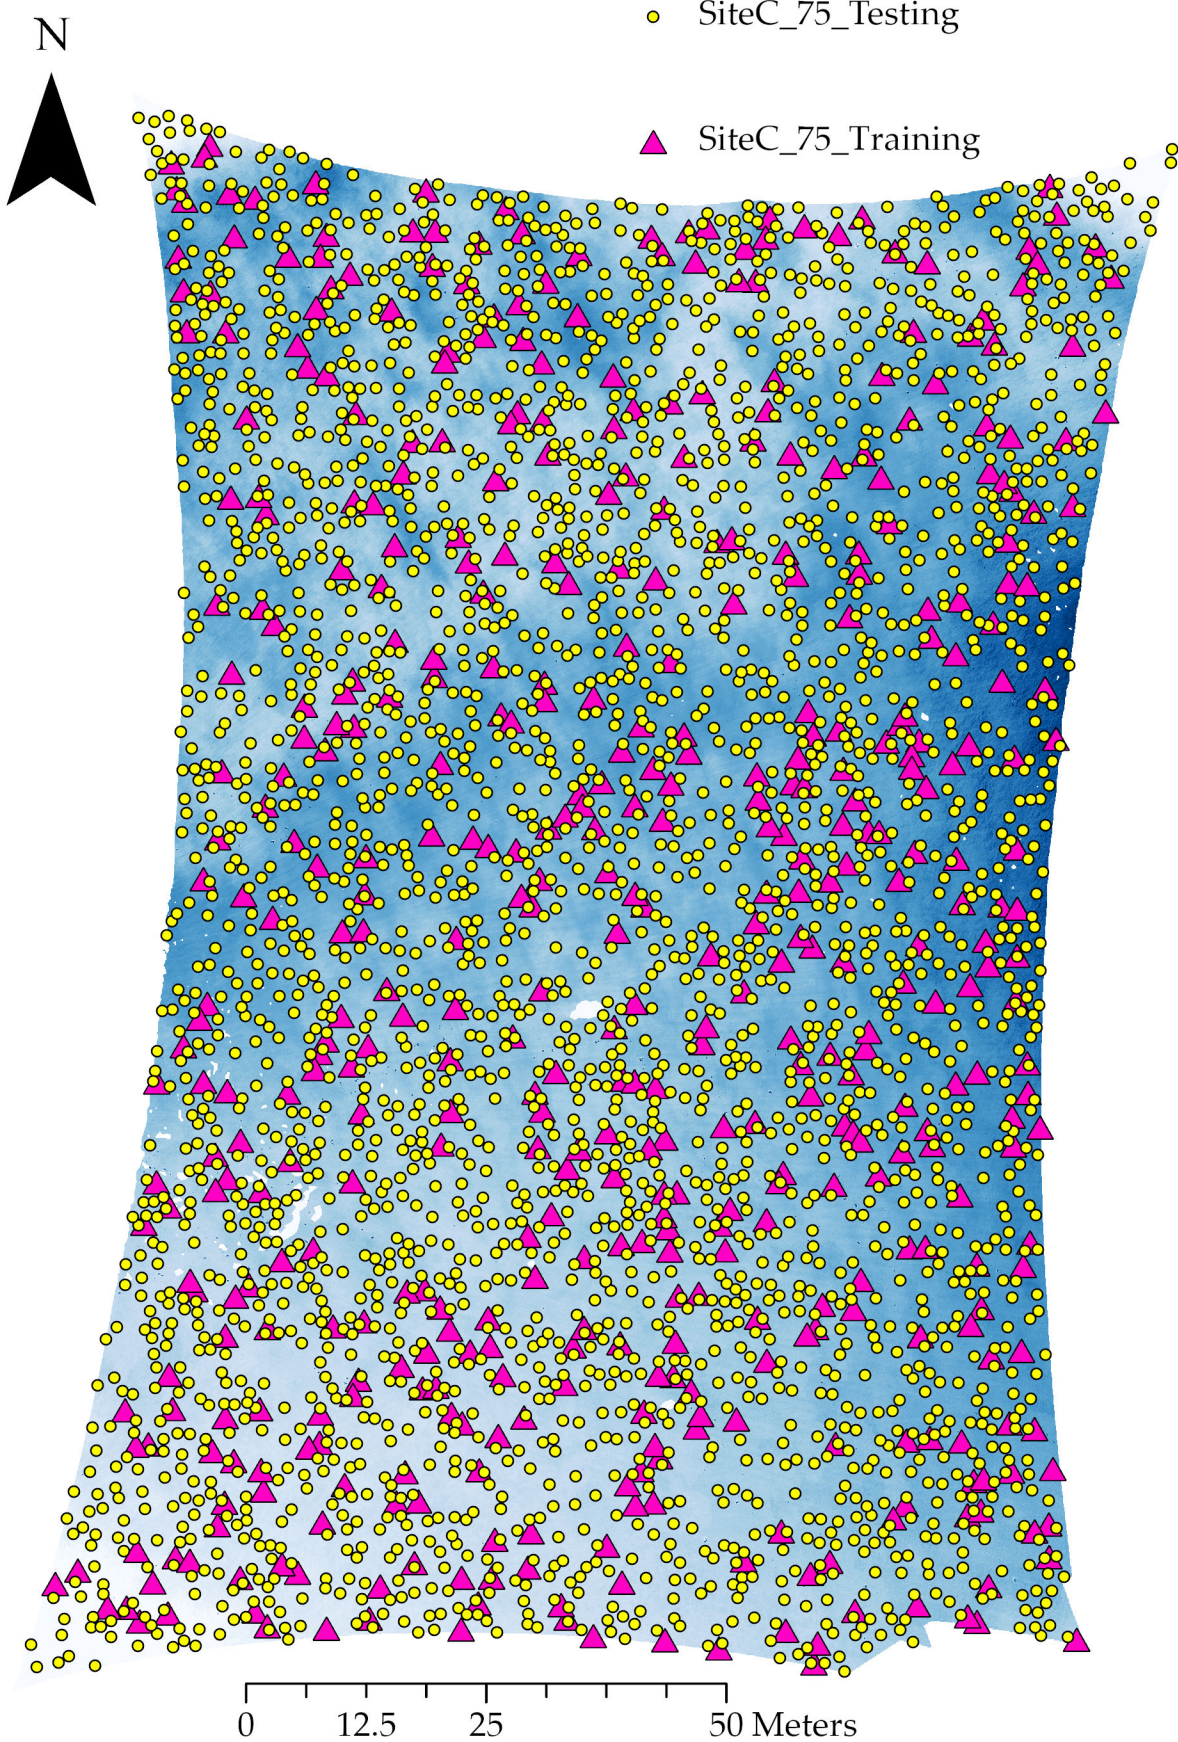

Supplement: s1 [file s1]

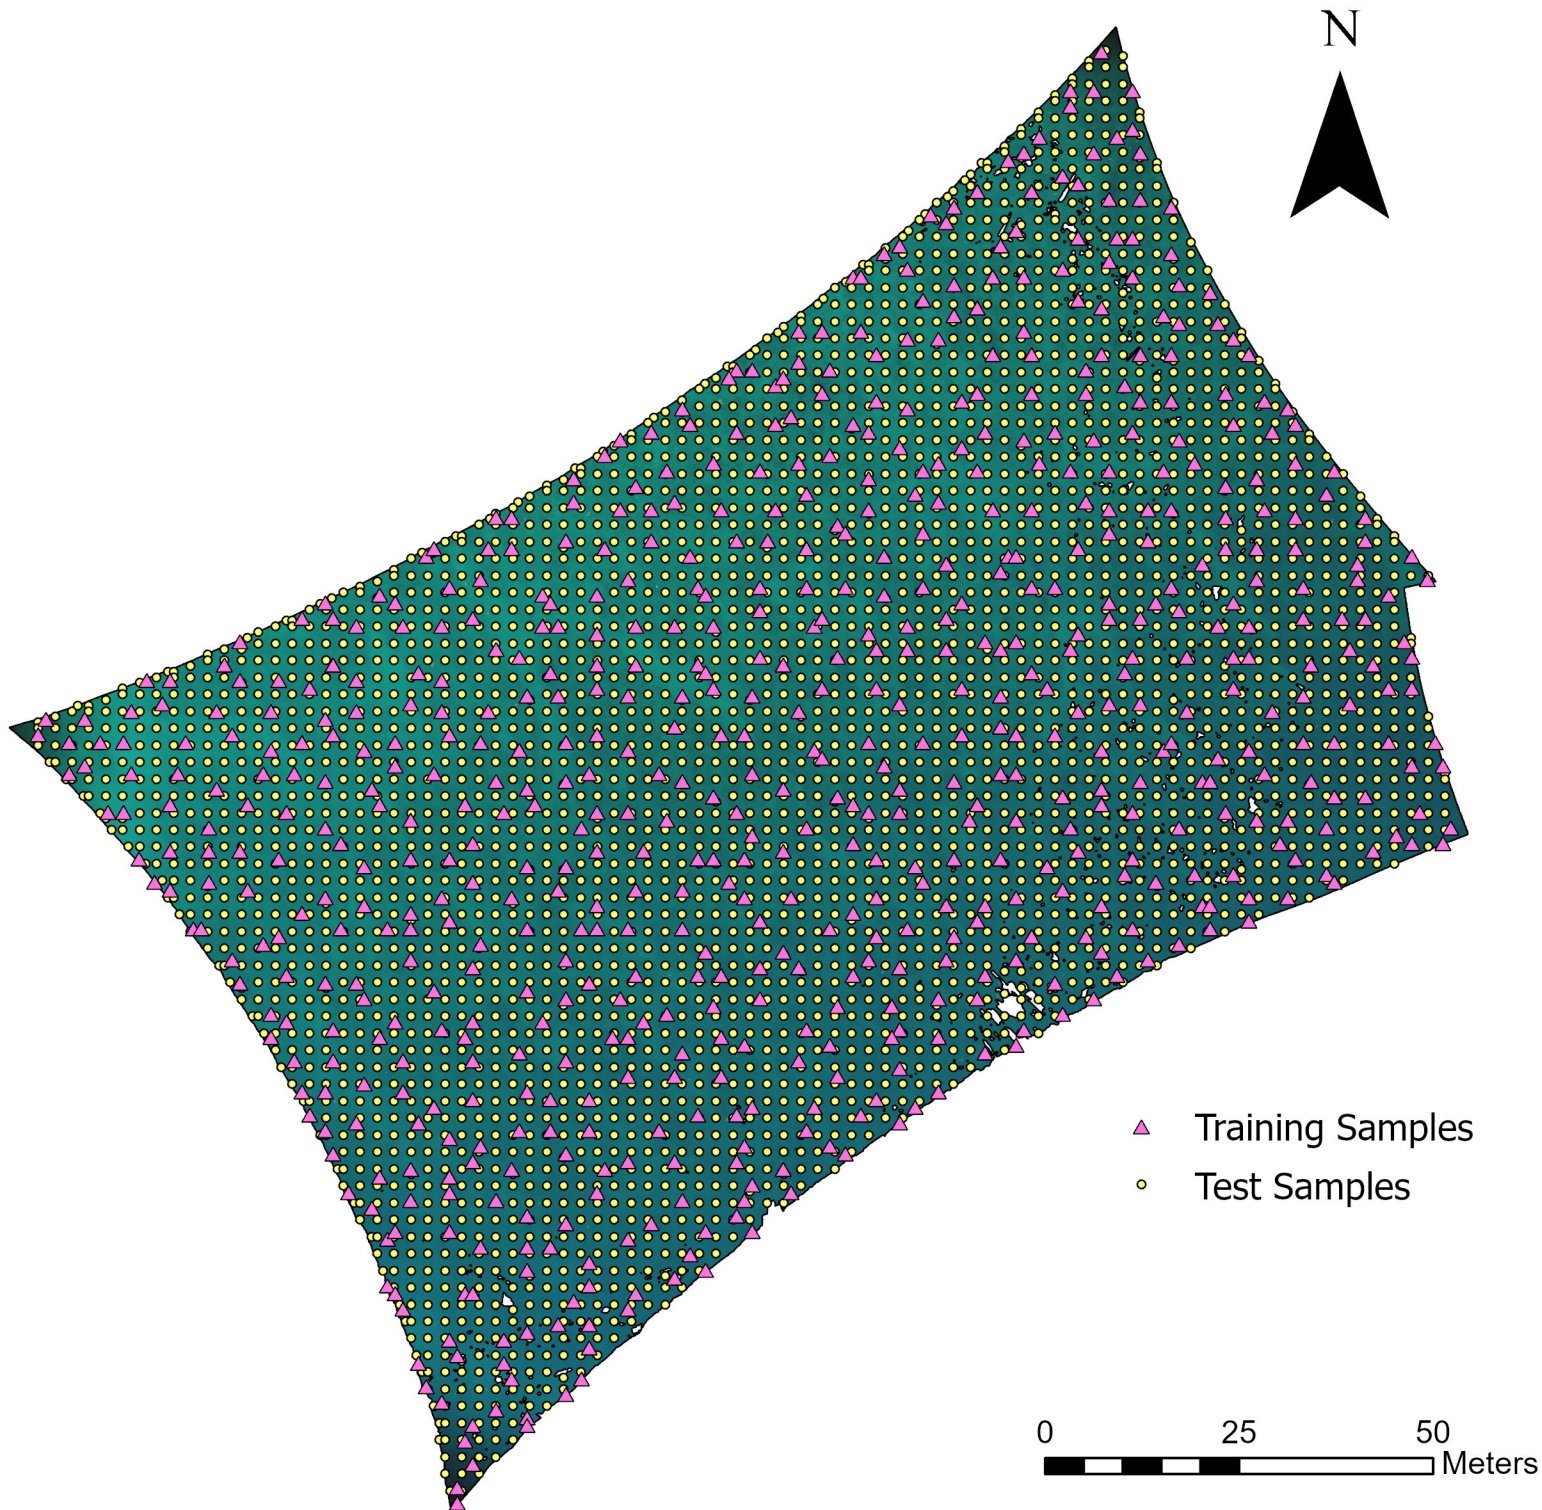

Supplement: s1 [file s1]
